1 **Maximum likelihood estimation of the geometric**  
2 **niche preemption model**

3 Jan Graffelman<sup>1,2,†</sup>

4 *email:* jan.graffelman@upc.edu

5 <sup>1</sup> Department of Statistics and Operations Research

6 Technical University of Catalonia

7 <sup>2</sup>Department of Biostatistics

8 University of Washington

---

<sup>†</sup>corresponding author: Carrer Jordi Girona 1-3, 08034 Barcelona, Spain  
tel: 00-34-934011739, fax: 00-34-934016575, E-mail: jan.graffelman@upc.edu

9

## Abstract

10           The geometric series or niche preemption model is an elementary eco-  
11           logical model in biodiversity studies. The preemption parameter of this  
12           model is usually estimated by regression or iteratively by using May's equa-  
13           tion. This article proposes a maximum likelihood estimator for the niche  
14           preemption model, assuming a known number of species and multinomial  
15           sampling. A simulation study shows that the maximum likelihood estimator  
16           outperforms the classical estimators in this context in terms of bias and pre-  
17           cision. We obtain the distribution of the maximum likelihood estimator and  
18           use it to obtain confidence intervals for the preemption parameter and to de-  
19           velop a preemption  $t$  test that can address the hypothesis of equal geometric  
20           decay in two samples. We illustrate the use of the new estimator with some  
21           empirical data sets taken from the literature and provide software for its use.

22   *Key words:* geometric series; preemption  $t$  test; broken stick model; rank-abundance  
23   plot; robustness;

## 24   **1 Introduction**

25   The statistical modeling of the relative abundance of a set of species in an ecolog-  
26   ical community has a longstanding history (Wilson, 1991). Classical elementary  
27   models are MacArthur's (1957) broken stick model, Fisher's (1943) log series, the  
28   geometric model (Motomura, 1932) and the log-normal model (Preston, 1962).  
29   Magurran (2004) provides an excellent introduction to these models. Over the last  
30   decades, many more refined models have been proposed (Tokeshi, 1990, 1996).  
31   Notwithstanding, the most elementary models such as the broken stick model and

32 the geometric series form important references and are widely applied (Fattorini,  
33 2005); they are usually the ones that are first fitted before more complicated al-  
34 ternatives are considered. In this article we focus on the geometric series, also  
35 known as the *niche preemption hypothesis*. This model assumes each species suc-  
36 cessively exploits a fraction  $k$  of the available resources, such that the first species  
37 exploits fraction  $k$  of the total resources, the second species fraction  $k$  of the re-  
38 maining  $1 - k$  resources, and so on. The exploited fraction is reflected by the  
39 relative abundance of the species in the community. Mathematically, the model is  
40 described by

$$\frac{n_i}{N} = \frac{k(1-k)^{i-1}}{1-(1-k)^S} \quad i = 1, \dots, S, \quad (1)$$

41 where  $N$  is the total number of individuals found,  $S$  the total number of species,  $n_i$   
42 the abundance of the  $i$ th species, and  $k$  the niche preemption parameter. In our no-  
43 tation, we will use  $n_{(i)}$  to refer to the ordered abundances, such that  $n_{(1)}$  and  $n_{(S)}$   
44 represent the most and least abundant species respectively. Doi and Mori (2013)  
45 gives more historical background on the geometric series. Though the geometric  
46 model is regarded as deterministic (Magurran, 2004), we note that the right hand  
47 side of Eq. (1) corresponds to the probability function of a truncated geometric dis-  
48 tribution. This model implies that the logarithm of the relative abundance decays  
49 linearly with the rank of the species, as illustrated in a logarithmic rank-abundance  
50 plot in Figure 1 for various values of  $k$ .

51 The geometric model has been found adequate for species-poor assemblages,  
52 resource-poor environments (Fattorini, 2005) and has also been advocated for  
53 ecosystems that suffer from anthropogenic disturbance (Caruso and Migliorini,

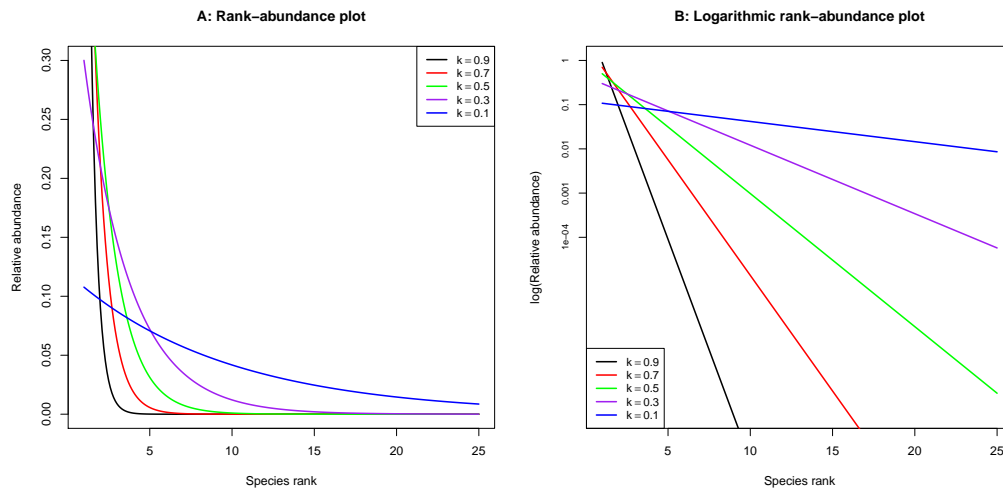

Figure 1: Rank-abundance plots for varying  $k$  of the geometric model with  $S = 25$ , with relative scale (panel A) and logarithmic scale (panel B).

54 2006) or that exhibit strong dominance of a few species (Keeley and Fothering-  
55 ham, 2003). Several estimators for  $k$  have been proposed in the literature. He  
56 and Tang (2008) used several estimators and observed that they provide similar  
57 estimates of  $k$ . However, a statistical study that compares the different estimators  
58 assessing their precision and bias seems not available. The main goal of this article  
59 is to present a new estimator based on maximum likelihood (ML), and to compare  
60 the different estimators in terms of bias and precision. The structure of the article  
61 is the following. In Section 2 we review existing estimators for the niche preemp-  
62 tion parameter, develop the ML estimator and present the preemption  $t$  test. In  
63 Section 3 we compare the different estimators in a simulation study. Section 4  
64 shows some applications using ecological datasets taken from the literature. We  
65 finish with a discussion of the different estimators.

## 66 **2 Preemption parameter estimation and the preemp-** 67 **tion $t$ test**

68 We briefly summarise some popular estimators for  $k$ , and develop the maximum  
69 likelihood estimator. May (1975) proposed to estimate  $k$  by solving the equation

$$\frac{n_{(S)}}{N} = \frac{k(1-k)^{(S-1)}}{1-(1-k)^S}. \quad (2)$$

70 This result is obtained by applying Eq. (1) to the minimum abundance with rank  
71  $i = S$ . This equation can easily be solved on a computer by applying an algorithm  
72 searching for the root of a non-linear equation. He and Tang (2008) used both the  
73 minimum and maximum abundance, and proposed the estimator

$$\hat{k}_{HT} = 1 - \left( \frac{n_{(S)}}{n_{(1)}} \right)^{1/(S-1)}, \quad (3)$$

74 which follows from the fact that successive abundances have a constant ratio. The  
75 least-squares regression estimator (He and Tang, 2008),  $\hat{k}_{LS}$ , is obtained by noting  
76 that the logarithm of the relative abundance is linear in the rank  $i$  of the species  
77 with slope  $b_1 = \ln(1-k)$ ;

$$\ln\left(\frac{n_i}{N}\right) = \ln\left(\frac{k}{(1-k)(1-(1-k)^S)}\right) + \{\ln(1-k)\}i \quad (4)$$

78 By transforming the slope, we have:

$$\hat{k}_{LS} = 1 - e^{b_1}, \quad (5)$$

79 where  $b_1$  is the least squares estimator for the slope obtained by simple linear re-

gression of  $y_i = \ln\left(\frac{n_i}{N}\right)$  on rank  $i$ . We note here that  $\hat{k}_{May}$  and  $\hat{k}_{HT}$  do not assume  
a statistical model for the data, but employ the geometric series in a completely de-  
terministic manner. The geometric series is considered to be a deterministic niche  
apportionment model (Magurran, 2004, p. 47). Consequently, there is no esti-  
mation of a measure of uncertainty for these estimators. The regression estimator  
 $\hat{k}_{LS}$  assumes that deviations from geometric decay follow a normal distribution  
and therefore an expression of the uncertainty of the estimate can be obtained by  
back-transforming the limits of the confidence interval for  $\beta_1$ :

$$CI(k) = \left(1 - e^{b_1 + t_{\alpha/2} s_{b_1}}, 1 - e^{b_1 - t_{\alpha/2} s_{b_1}}\right), \quad (6)$$

where  $s_{b_1}$  is the standard error of the slope, and  $t_{\alpha/2}$  the upper percentile of a  
Student  $t$  distribution with  $S - 2$  degrees of freedom. We proceed by developing  
the maximum likelihood estimator. If the number of species  $S$  is considered fixed,  
then the data consists of counts in a limited number of  $S$  categories, which can be  
probabilistically modeled by the multinomial distribution, given by.

$$L(\theta|\mathbf{n}) = \frac{N!}{\prod_{i=1}^S n_i!} \prod_{i=1}^S \theta_i^{n_i} = \frac{N!}{\prod_{i=1}^S n_i!} \prod_{i=1}^S \left(\frac{k(1-k)^{i-1}}{1-(1-k)^S}\right)^{n_i}. \quad (7)$$

Under the geometric model, the parameters of this multinomial distribution are  
restricted, such that the parameter  $\theta_i$  is given by the truncated geometric distri-  
bution given by the right hand side of Eq. (1). Maximizing the log-likelihood  
analytically, we find no closed form solution for  $k$ . The ML estimator  $\hat{k}_{ML}$  must

97 be found by numerically solving the equation

$$N - k \sum_{i=1}^S i \cdot n_i - (1 - k)^S \left( N(1 + kS) - k \sum_{i=1}^S i \cdot n_i \right) = 0 \quad (8)$$

98 for  $k$ . For communities with few dominant species (large  $k$ ), the last term in  
 99 Eq. (8) will generally be small, and the ML estimator can be approximated, in  
 100 closed form, by

$$\hat{k}_{ML} \approx \frac{N}{\sum_{i=1}^S i \cdot n_i} = \frac{n_1 + n_2 + \dots + n_S}{n_1 + 2n_2 + 3n_3 + \dots + Sn_S}, \quad (9)$$

101 which is the total abundance divided by the abundance-weighted sum of the ranks.  
 102 Eq. (9) can be used as initial estimate for the fast resolution of Eq. (8). By devel-  
 103 oping the second derivative of the log-likelihood function, the variance of the ML  
 104 estimator is obtained as

$$V(\hat{k}_{ML}) = \frac{k^2(1 - k)^2 C_k^2}{N(1 - 2k)C_k^2 + NkC_k(1 - (1 - k)^S\{1 + kS\}) + NSk^2(1 - k)^S(C_k - S)}, \quad (10)$$

105 with  $C_k = 1 - (1 - k)^S$ , and this variance can be estimated by substituting  $\hat{k}$  for  
 106  $k$ . Because the ML estimator is asymptotically unbiased, efficient, and normally  
 107 distributed (Casella and Berger, 2002, Chapter 10), we can construct a  $100(1 - \alpha)$   
 108 percent confidence interval for  $k$  which is given by

$$CI_{(1-\alpha)}(k) = \hat{k}_{ML} \pm z_{\alpha/2} \cdot \sqrt{V(\hat{k}_{ML})}. \quad (11)$$

109 The limits of this confidence interval allow for hypothesis testing with  $k$ , and they  
 110 can also be used to show the uncertainty in the estimate of  $k$  in a rank-abundance

111 plot (See Figures 3 and 4) by painting a corresponding grey area around the line  
112 of decay. We study the statistical properties of the new ML estimator and its clas-  
113 sical counterparts in a simulation study in Section 3.

114

115 Many biodiversity studies are of comparative nature. It is often of interest to  
116 compare two (or more) independent samples with respect to some measure of di-  
117 versity. Such tests have been developed for the Shannon index (Hutcheson, 1970)  
118 and for Simpson's index (Brower et al., 1998), but are apparently not available  
119 for the preemption parameter of the geometric series. To test the null hypothesis  
120  $k_1 = k_2$  against  $k_1 \neq k_2$ , we can use the test statistic

$$T = \frac{\hat{k}_1 - \hat{k}_2}{\sqrt{V(\hat{k}_1) + V(\hat{k}_2)}}. \quad (12)$$

121 The development of this test is analogous to a standard two-sample  $t$  test for equal-  
122 ity of means without assuming equality of variances for the two groups (DeGroot,  
123 1986), using the Welch modification. Under the null, statistic  $T$  follows a student  
124  $t$  distribution with degrees of freedom (df) given by:

$$\text{df} = \frac{\left(V(\hat{k}_1) + V(\hat{k}_2)\right)^2}{V(\hat{k}_1)^2/N_1 + V(\hat{k}_2)^2/N_2}. \quad (13)$$

125 We refer to this test as the *preemption  $t$  test*. Some examples are given in Section 4  
126 below. In practice,  $N_1$  and  $N_2$  are large, and the standard normal distribution can  
127 be used for the calculation of the p-value.



### 128 **3 Monte Carlo simulations**

129 We simulate species counts by drawing samples from the multinomial distri-  
130 bution given by Eq. (7), for given  $N, S$  and a considering a sequence of val-  
131 ues  $(0.1, 0.2, \dots 0.9)$  for preemption parameter  $k$ . We repeat simulations 10,000  
132 times, computing all four estimators presented in the previous section. Boxplots  
133 of the values of the estimators obtained in the simulations are shown in Figure 2.  
134 This figure shows the ML estimator has the smallest variance for all values of  $k$ .  
135 All other estimators typically have more bias than the ML estimator. Table 1 sum-  
136 marizes the results of the simulation, quantifying bias, variance and mean squared  
137 error (MSE) for all estimators and different values of  $k$ .

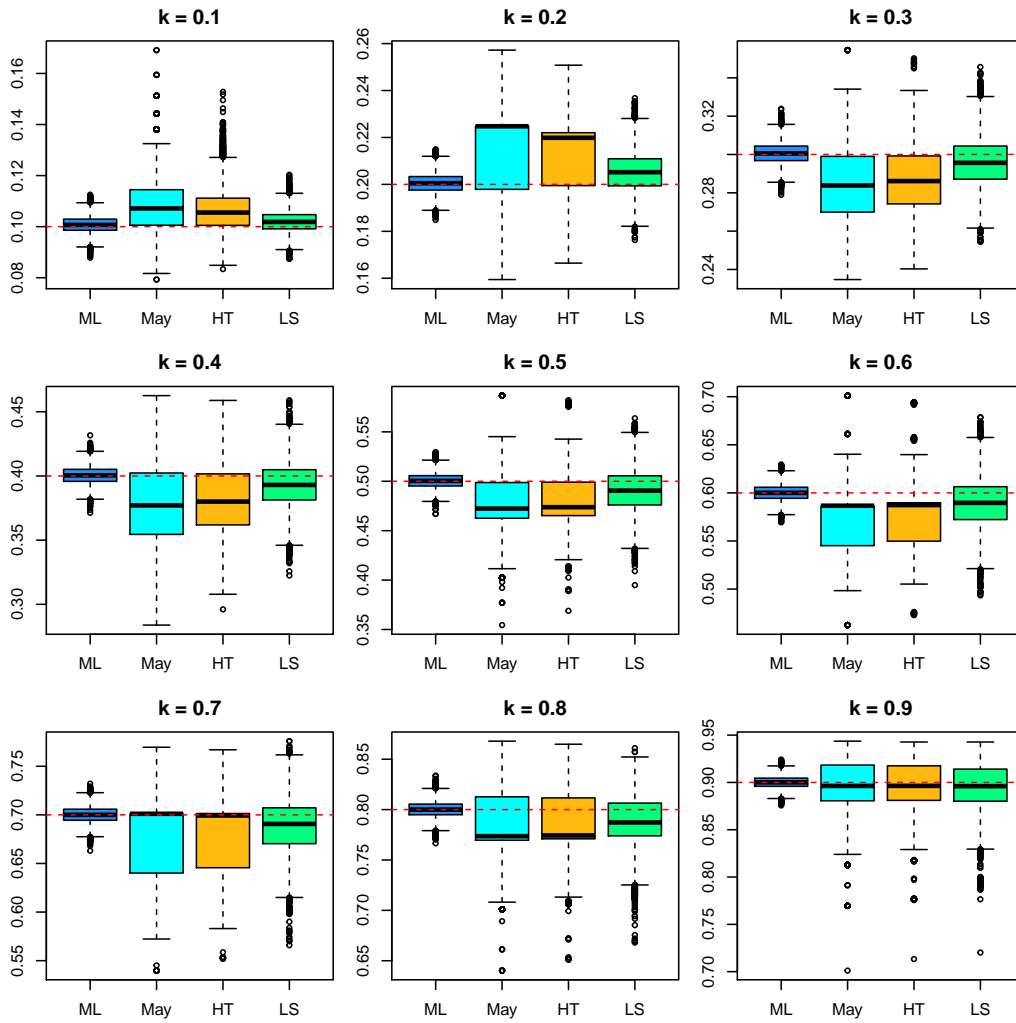

Figure 2: Monte Carlo simulations for the geometric series. Distribution of the different estimators for  $N = 2,000$ ,  $S = 25$  and various values of  $k$ .

138 For small value of  $k$  ( $\leq 0.20$ ) the estimators of May, He and Tang, and the regres-  
139 sion estimator have positive bias, and for larger values they have negative bias.  
140 Table 1 shows that the ML estimator has the smallest bias, variance and MSE in  
141 all settings, and is clearly the estimator with the best statistical properties. The  
142 least-squares estimator has generally less bias than the estimators of May and He  
143 and Tang. The estimator of May has the largest variance, and also presents more  
144 outliers. Similar results were obtained for larger and smaller values of  $N$  (results  
145 not shown).

| $k$ | Method | mean   | bias    | var     | mse     |
|-----|--------|--------|---------|---------|---------|
| 0.1 | ML     | 0.1007 | 0.0007  | 0.00001 | 0.00001 |
|     | May    | 0.1084 | 0.0084  | 0.00012 | 0.00019 |
|     | HT     | 0.1063 | 0.0063  | 0.00007 | 0.00011 |
|     | LS     | 0.1020 | 0.0020  | 0.00002 | 0.00002 |
| 0.2 | ML     | 0.2005 | 0.0005  | 0.00002 | 0.00002 |
|     | May    | 0.2156 | 0.0156  | 0.00025 | 0.00049 |
|     | HT     | 0.2132 | 0.0132  | 0.00018 | 0.00035 |
|     | LS     | 0.2053 | 0.0053  | 0.00007 | 0.00010 |
| 0.3 | ML     | 0.3006 | 0.0006  | 0.00003 | 0.00003 |
|     | May    | 0.2862 | -0.0138 | 0.00035 | 0.00054 |
|     | HT     | 0.2879 | -0.0121 | 0.00027 | 0.00041 |
|     | LS     | 0.2959 | -0.0041 | 0.00016 | 0.00018 |
| 0.4 | ML     | 0.4005 | 0.0005  | 0.00005 | 0.00005 |
|     | May    | 0.3813 | -0.0187 | 0.00068 | 0.00103 |
|     | HT     | 0.3834 | -0.0166 | 0.00053 | 0.00081 |
|     | LS     | 0.3930 | -0.0070 | 0.00031 | 0.00035 |
| 0.5 | ML     | 0.5005 | 0.0005  | 0.00006 | 0.00006 |
|     | May    | 0.4792 | -0.0208 | 0.00102 | 0.00145 |
|     | HT     | 0.4814 | -0.0186 | 0.00082 | 0.00117 |
|     | LS     | 0.4907 | -0.0093 | 0.00047 | 0.00056 |
| 0.6 | ML     | 0.6001 | 0.0001  | 0.00007 | 0.00007 |
|     | May    | 0.5788 | -0.0212 | 0.00127 | 0.00172 |
|     | HT     | 0.5808 | -0.0192 | 0.00106 | 0.00143 |
|     | LS     | 0.5894 | -0.0106 | 0.00063 | 0.00074 |
| 0.7 | ML     | 0.7002 | 0.0002  | 0.00007 | 0.00007 |
|     | May    | 0.6798 | -0.0202 | 0.00137 | 0.00178 |
|     | HT     | 0.6815 | -0.0185 | 0.00117 | 0.00151 |
|     | LS     | 0.6891 | -0.0109 | 0.00072 | 0.00084 |
| 0.8 | ML     | 0.8001 | 0.0001  | 0.00006 | 0.00006 |
|     | May    | 0.7829 | -0.0171 | 0.00129 | 0.00158 |
|     | HT     | 0.7841 | -0.0159 | 0.00114 | 0.00139 |
|     | LS     | 0.7895 | -0.0105 | 0.00075 | 0.00086 |
| 0.9 | ML     | 0.9001 | 0.0001  | 0.00004 | 0.00004 |
|     | May    | 0.8896 | -0.0104 | 0.00072 | 0.00083 |
|     | HT     | 0.8902 | -0.0098 | 0.00066 | 0.00076 |
|     | LS     | 0.8924 | -0.0076 | 0.00048 | 0.00054 |

Table 1: Mean, variance, bias and mean squared error for different estimators of preemption parameter  $k$ .

## 146 **4 Analysis of empirical data sets**

147 In this section we apply the different estimators to some empirical datasets taken  
148 from the ecological literature. Many data sets are available at the Ecological Reg-  
149 ister (Alroy, 2015). We use Australian bird abundances (Fattorini, 2005; Magur-  
150 ran, 1988) and Indian dung beetles (Ganeshiah et al., 1997; Magurran, 2004) to  
151 illustrate the difference between estimators of the preemption parameter. We use  
152 the dung beetle data from Mehrabi et al. (2014) to illustrate the preemption  $t$ -test.

### 153 **4.1 Australian bird abundances**

154 The abundances of  $S = 31$  bird species in wet sclerophyll forest, totalling  $N =$   
155 834 individuals were recorded. Figure 3 shows the rank-abundance plot of this data,  
156 with a fitted line for each of the four estimators discussed in Section 2. The numer-  
157 ical estimates of the preemption parameter are very similar for all four estimators  
158 (See Table 2) and by visual inspection the geometric model is seen to fit the data  
159 very well. The grey zone in the plot is determined by the confidence limits for the  
160 ML estimator. All other estimators give values inside this confidence interval, and  
can be considered not to differ significantly from the ML estimate.

| Estimator | $\hat{k}$ | se     | 95% CI         |
|-----------|-----------|--------|----------------|
| May       | 0.149     | -      | -              |
| HT        | 0.146     | -      | -              |
| LS        | 0.142     | -      | (0.136, 0.148) |
| ML        | 0.143     | 0.0051 | (0.133, 0.153) |

Table 2: Estimates of the preemption parameter for the Australian bird data ac-  
cording to different methods (se = standard error, CI = confidence interval).

161

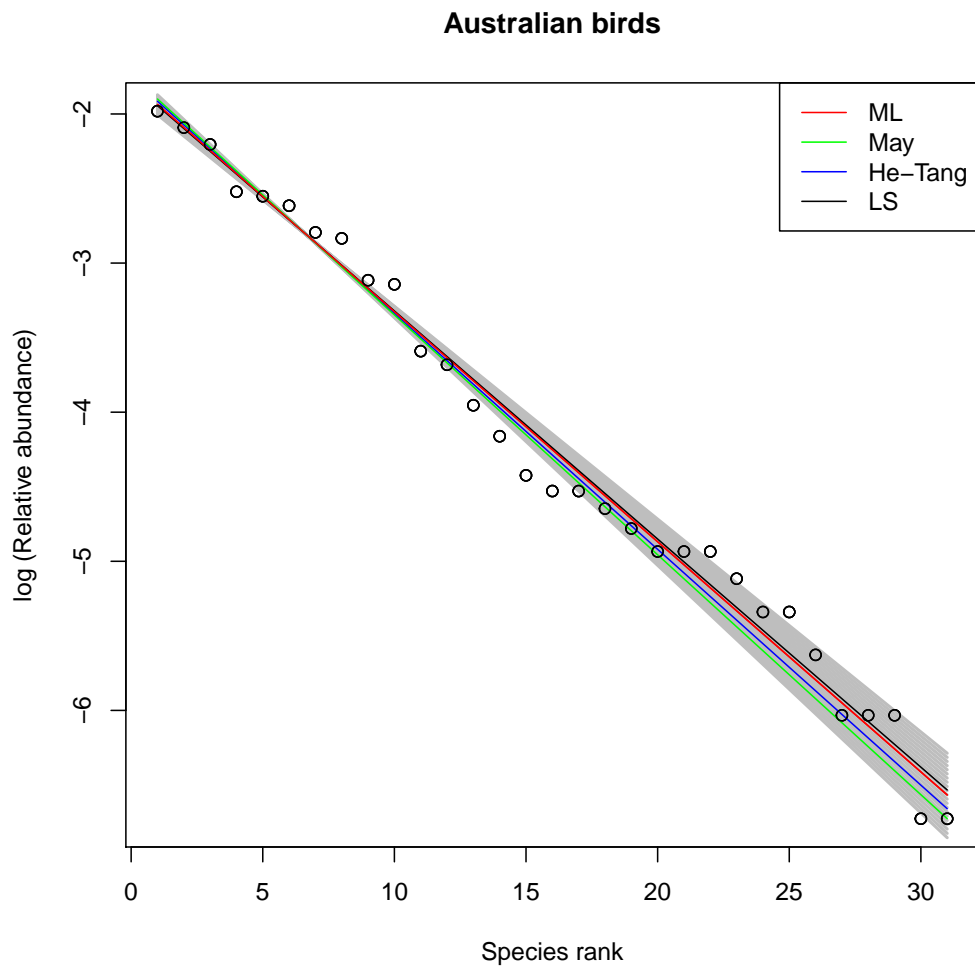

Figure 3: Rank-abundance plot of Australian birds in wet sclerophyll forest. Fitted lines represent geometric models estimated by maximum likelihood (ML), May's equation (May), He-Tang's estimator and least-squares regression (LS).

## 162 **4.2 Indian dung beetles**

163 Figure 4 shows the rank-abundance plot of the Indian dung beetle data. Note that  
164 there is a considerable difference between May's classical estimator and the ML  
165 estimate. The ML estimator is 31% larger. Expected relative frequencies (in the  
166 log scale) have been calculated and plotted in Figure 4 to show the fit of all es-  
167 timators. This shows May's estimator underestimates the frequency of the most  
168 abundant beetle, and overestimates the frequencies of almost all other species.  
169 The ML estimator fits the abundant species much better and is seen to underesti-  
170 mate the rare species. The values of the different estimators are given in Table 3.  
171 We note that May's classical estimator, He-Tang's estimator and the regression  
172 estimator are all outside the confidence interval of the ML estimator. There is  
173 clearly a significant difference between the ML estimator and its alternatives, the  
174 ML estimator suggesting a stronger decay.

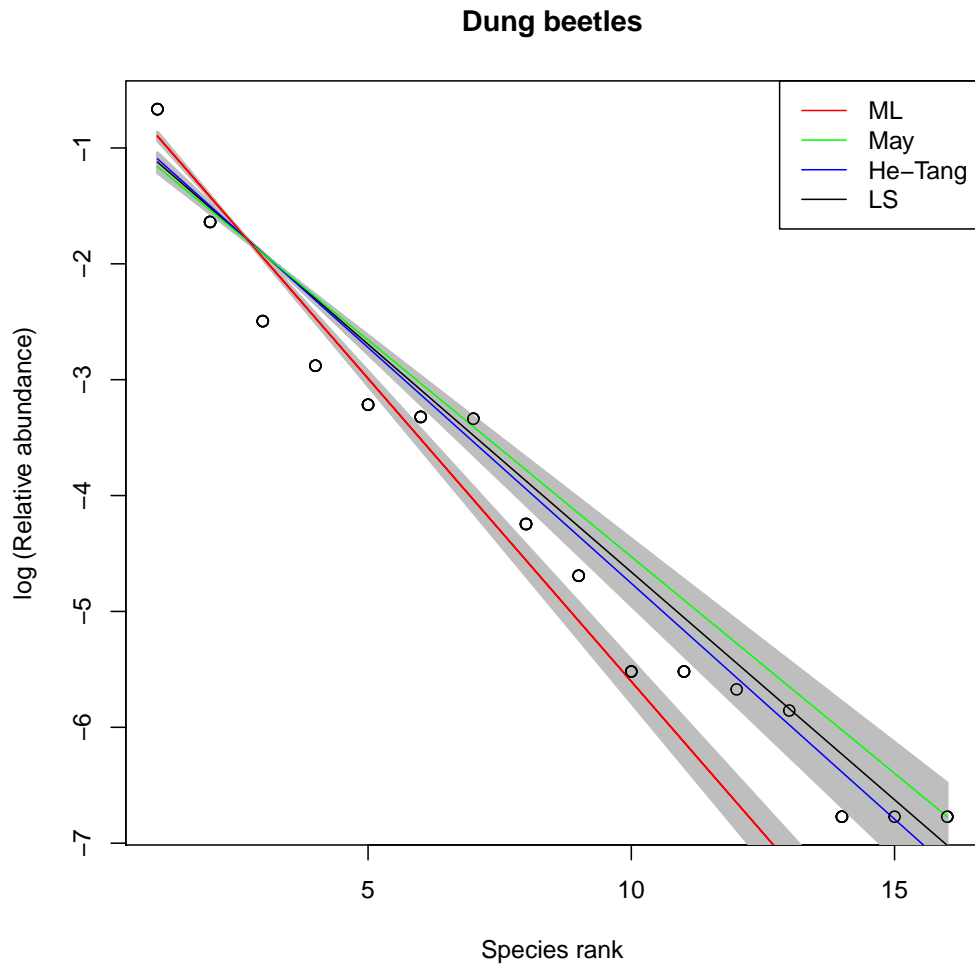

Figure 4: Rank-abundance plot of Indian dung beetles. Lines represent geometric decay according to four different estimators. Grey areas indicate the confidence regions for the ML and LS estimators.



| Estimator | $\hat{k}$ | se     | 95% CI         |
|-----------|-----------|--------|----------------|
| May       | 0.312     | -      | -              |
| HT        | 0.334     | -      | -              |
| LS        | 0.325     | -      | (0.296, 0.353) |
| ML        | 0.407     | 0.0076 | (0.392, 0.422) |

Table 3: Estimates of the preemption parameter for the Indian dung beetles according to different methods.

### 175 **4.3 Preemption $t$ test with Costa Rican dung beetles**

176 Mehrabi et al. (2014) performed a comparative biodiversity study, where the counts  
177 of dung beetles, an important indicator taxon, were registered along eight tran-  
178 sects under two conditions, micro-habitat standardized placement (treatment) and  
179 random placement (control) of baited traps. We use the transect level counts ob-  
180 tained by summing over traps sampled under the same condition. It is of interest  
181 to compare estimates of diversity parameters under the two conditions. Figure 5  
182 shows the rank-abundance plots for the eight transects where the preemption pa-  
183 rameter has been estimated for both conditions. Table 4 shows the ML estimates  
184 of the preemption parameter, and the results of the preemption  $t$  test described in  
185 Section 2. Figure 5 shows overlapping confidence intervals for transect pairs C-D,  
186 I-J, K-L and M-N. The preemption  $t$  test results in Table 4 show non-significant  
187 differences and overlapping confidence intervals for the first three of these, and  
188 a borderline p-value for transect M-N. All other transect pairs have very small  
189 p-values, indicating significant differences in the preemption parameter for the  
190 two conditions. For these transects, the ML estimator gives a faster decay for the  
191 control transects. This corroborates the finding of Mehrabi et al. (2014) that the  
192 micro-habitat standardized transects were more diverse.

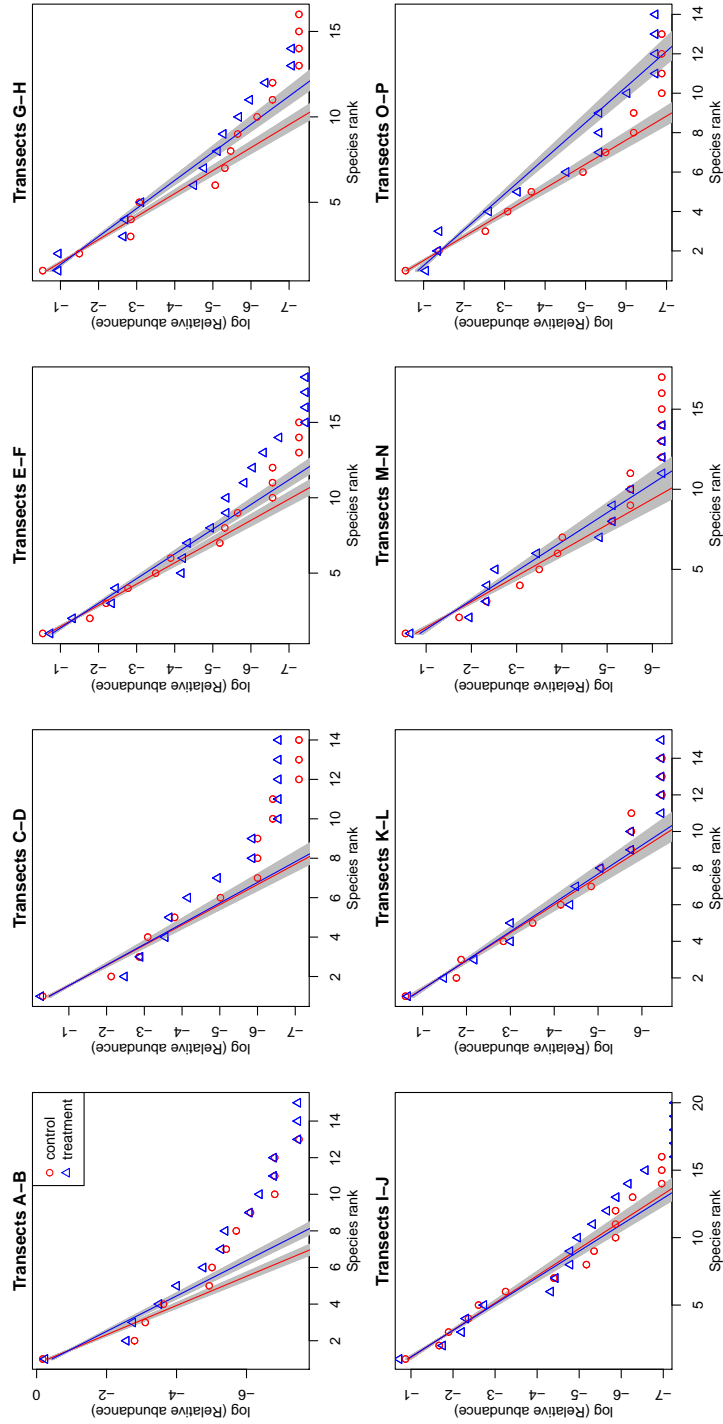

Figure 5: Rank-abundance plots of Costa Rican dung beetles. Lines represent geometric decay for the ML estimators for two transects, one in blue (treatment) and one in red (control). Grey areas indicate the confidence regions for the ML estimators.

| Transects | $\hat{k}_1$ | $CI(k_1)$       | $\hat{k}_2$ | $CI(k_2)$       | $T$    | $p$ -value |
|-----------|-------------|-----------------|-------------|-----------------|--------|------------|
| A-B       | 0.715       | (0.697 , 0.732) | 0.644       | (0.626 , 0.662) | 5.480  | 0.000      |
| C-D       | 0.623       | (0.601 , 0.644) | 0.615       | (0.587 , 0.643) | 0.414  | 0.679      |
| E-F       | 0.508       | (0.490 , 0.527) | 0.457       | (0.441 , 0.473) | 4.113  | 0.000      |
| G-H       | 0.525       | (0.506 , 0.544) | 0.456       | (0.437 , 0.475) | 5.012  | 0.000      |
| I-J       | 0.391       | (0.373 , 0.409) | 0.400       | (0.384 , 0.416) | -0.704 | 0.481      |
| K-L       | 0.480       | (0.453 , 0.507) | 0.471       | (0.444 , 0.498) | 0.475  | 0.635      |
| M-N       | 0.464       | (0.434 , 0.494) | 0.423       | (0.394 , 0.451) | 1.979  | 0.048      |
| O-P       | 0.559       | (0.536 , 0.582) | 0.424       | (0.402 , 0.446) | 8.256  | 0.000      |

Table 4: ML estimates ( $\hat{k}_1, \hat{k}_2$ ) of preemption parameter  $k$  for eight pairs of transects under two conditions,  $T$ -statistic and  $p$ -value of a preemption  $t$ -test.

## 193 **5 Conclusions and discussion**

194 We have developed a maximum likelihood estimator for the niche preemption pa-  
195 rameter of the geometric model. In this work, we assume the number of species  
196  $S$  to be known, such that multinomial sampling with a fixed number of categories  
197 applies. In empirical studies, fixing  $S$  maybe reasonable if the community of  
198 interest has been exhaustively surveyed, and the number of species is known in  
199 advance. The geometric model has been found adequate for species-poor com-  
200 munities (Magurran, 2004) such as those in process of colonization (He and Tang,  
201 2008). In such circumstances, the number of competing species may indeed very  
202 well be known, and fixing  $S$  then seems reasonable. Importantly, in such a de-  
203 sign, zero abundances are admitted, because not all species are observed, due to  
204 the fact that some are rare, or not present in the sample by mere chance. The  
205 proposed ML estimator can deal with zeros, as the latter arise naturally under the  
206 multinomial distribution. May's classical estimator cannot cope with zeros, as  
207 these lead to  $k = 0$  or  $k = 1$ . He and Tang's estimator can neither be used, be-  
208 cause it will always produce  $k = 1$  if a zero is present. Estimation by regression  
209 with log transformed relative abundances neither works for giving  $\ln(0) = -\infty$   
210 for zero counts. Indeed, to sensibly apply all the classical estimators, zeros must  
211 first be discarded, and  $S$  reduced correspondingly. For the ML estimator, zeros  
212 are unproblematic. The approximate form (Eq. (9)) gives the same estimate with  
213 and without zeros, and the exact form (Eq. (8)) typically shows only minor vari-  
214 ation due to different  $S$  under removal or inclusion of zeros. In future work, the  
215 maximum likelihood approach presented here could be extended to the double ge-  
216 ometric model from Alroy (2015).

217

218 In comparative biodiversity studies, multiple samples of similar communities are  
219 often obtained. In order to sensibly do so, the same set of species is typically de-  
220 termined for all samples. It easily occurs that some of the rarer species are absent  
221 in some of the sampled sites. In order to apply the classical estimators, the zeros  
222 must be discarded, and consequently  $S$  starts to vary over the samples. To keep  
223 the same  $S$  constant, one can subset the analysis to those species that appear in  
224 all samples, but this obviously entails a loss of information. The ML estimator  
225 is based on the multinomial distribution and admits zeros, neatly avoiding these  
226 problems.

227

228 The least-squares regression estimator (He and Tang, 2008; Caruso and Miglior-  
229 ini, 2006; Fattorini, 2005) is popular, and intuitively appealing, but it suffers from  
230 certain inconsistencies. Importantly, the geometric model has, for given  $N$  and  
231  $S$ , only one parameter, the preemption parameter  $k$ . However, linear regression  
232 estimates two parameters, slope  $\beta_1$  and intercept  $\beta_0$ . Eq. (5) estimates  $k$  from the  
233 slope, but that may be considered arbitrary. Because  $\beta_0$  also depends on  $k$  (see  
234 Eq. (4)), an alternative estimator for  $k$ , which will typically give a different point  
235 estimate, can be obtained from the intercept. Drawing a standard least-squares  
236 regression line with intercept  $b_0$  and slope  $b_1$  in the rank-abundance plot will often  
237 give a line that visually fits the data well, but it amounts to *overfitting* because  
238 the model of interest has in fact only one parameter. May's, He-Tang's and the  
239 proposed ML estimator are more coherent for estimating a single parameter.

240

241 We also note that the line fitted by May's methods always passes through

242  $(S, \ln(n_{(S)}/N))$ , thereby always artificially fitting the most rare species without  
243 error. Consequently, May's method capitalizes on the rare species. The prob-  
244 abilities of occurrence of the rare species are poorly estimated, because only a  
245 few individuals of them have been observed. Describing the geometric decay  
246 with an ordinary least squares regression (Eq. (4)) gives the *same weight* to  
247 highly abundance species whose proportion is determined with small relative  
248 error as to rare species whose proportion is determined with high relative error,  
249 and that looks at least questionable. The proposed ML estimator capitalizes on  
250 the abundant species and is less affected by the rare ones. The ML estimator  
251 therefore focusses on those measurements that have less relative error, which  
252 is a desirable property. If one singleton of an additional species is found, the  
253 numerator of Eq. (9) increases by 1 and the denominator by  $S + 1$ , which will in  
254 general hardly affect the ML estimate of  $k$ , showing clearly its *robustness* to the  
255 inclusion or deletion of some rare species.

256

257 There are many ecological studies in which the preemption parameter of the ge-  
258 ometric series is estimated and reported, but a quantification of the uncertainty in  
259 the estimate is almost never given. The derivation of the ML estimator and its dis-  
260 tribution in this article enable, by means of confidence intervals, the expression of  
261 the uncertainty in the estimation of the preemption parameter, and the comparison  
262 of such estimates by means of the preemption  $t$  test.

## 263 **6 Software**

264 An R package (R Development Core Team, 2004) named `MLpreemption` has  
265 been written providing functions for estimation of the preemption parameter by  
266 maximum likelihood and other methods. The package also includes the preemp-  
267 tion  $t$  test and the datasets analysed in this paper, and is available on CRAN and  
268 on the author's homepage.

## 269 **7 Acknowledgements**

270 This work was partially supported by grants RTI2018-095518-B-C22 of the Span-  
271 ish Ministry of Science, Innovation and Universities and the European Regional  
272 Development Fund, and by grant R01 GM075091 from the United States National  
273 Institutes of Health.

## 274 **References**

- 275 Alroy, J. 2015. The shape of terrestrial abundance distributions. Science  
276 Advances, 1(8):e1500082.
- 277 Brower, J., Zar, J., and von Ende, C. 1998. Field and Laboratory Methods for  
278 General Ecology. McGraw-Hill, Boston.
- 279 Caruso, T. and Migliorini, M. 2006. A new formulation of the geometric se-  
280 ries with applications to oribatid (Acari, Oribatida) species assemblages from  
281 human-disturbed mediterranean areas. Ecological Modelling, 195(3):402 –  
282 406.

- 283 Casella, R. and Berger, R. 2002. Statistical Inference. Duxbury, second edition.
- 284 DeGroot, M. 1986. Probability and Statistics. Addison-Wesley, second edition.
- 285 Doi, H. and Mori, T. 2013. The discovery of species–abundance distribution in an  
286 ecological community. Oikos, 122:179–182.
- 287 Fattorini, S. 2005. A simple method to fit geometric series and broken stick mod-  
288 els in community ecology and island biogeography. Acta Oecologica, 28:199–  
289 205.
- 290 Fisher, R., Steven Corbet, A., and Williams, C. 1943. The relation between the  
291 number of species and the number of individuals in a random sample of an  
292 animal population. Journal of Animal Ecology, 12(1):42–58.
- 293 Ganeshiah, K., Chandrashekara, K., and A.R.V., K. 1997. Avalanche index: a  
294 new measure of biodiversity based on biological heterogeneity of the commu-  
295 nities. Current Science, 73:128–133.
- 296 He, F. and Tang, D. 2008. Estimating the niche preemption parameter of the  
297 geometric series. Acta Oecologica, 33:105–107.
- 298 Hutcheson, K. 1970. A test for comparing diversities based on the shannon for-  
299 mula. Journal of Theoretical Biology, 29:151–154.
- 300 Keeley, J. and Fotheringham, C. 2003. Species-area relationships in  
301 mediterranean-climate plant communities. Journal of Biogeography, 30:1629–  
302 1657.
- 303 MacArthur, R. 1957. On the relative abundance of bird species. Proceedings of  
304 the National Academy of Sciences, 43:293–295.



- 305 Magurran, A. 1988. Ecological diversity and its measurement. Princeton Univer-  
306 sity.
- 307 Magurran, A. 2004. Measuring biological diversity. Blackwell Publishing, Ox-  
308 ford, UK.
- 309 May, R. 1975. Patterns of species abundance and diversity. In Cody, M. and  
310 Diamond, M., editors, Ecology and Evolution of Communities, pages 81–120.  
311 Harvard Univ. Press.
- 312 Mehrabi, Z., Slade, E., Solis, A., and Mann, D. 2014. The importance of micro-  
313 habitat for biodiversity sampling. PLoS ONE, 9(12):e114015.
- 314 Motomura, I. 1932. A statistical treatment of associations. Japanese Journal of  
315 Zoology, 44:379–383.
- 316 Preston, F. 1962. The canonical distribution of commonness and rarity. Ecology,  
317 43(2):185–215, 410–432.
- 318 R Development Core Team 2004. R: A language and environment for statistical  
319 computing. R Foundation for Statistical Computing, Vienna, Austria. ISBN  
320 3-900051-00-3.
- 321 Tokeshi, M. 1990. Niche apportionment or random assortment: Species abun-  
322 dance patterns revisited. Journal of Animal Ecology, 59(3):1129–1146.
- 323 Tokeshi, M. 1996. Power fraction: A new explanation of relative abundance pat-  
324 terns in species-rich assemblages. Oikos, 75(3):543–550.
- 325 Wilson, J. 1991. Methods for fitting dominance diversity curves. Journal of  
326 Vegetation Science, 2:35–46.
